# Supplementary material
Source: PubMed Central journal article supplement (PMC7722693)
Supplement: NEJMoa2021801_data-sharing.pdf [file NEJMoa2021801_data-sharing.pdf]

## Data Sharing Statement

Mitjà O, Corbacho-Monné M, Ubals M, et al. A Cluster-Randomized Trial of Hydroxychloroquine for Prevention of Covid-19. N Engl J Med. DOI: 10.1056/NEJMoa2021801.

| Question                                                            | Authors' Response                                            |
|---------------------------------------------------------------------|--------------------------------------------------------------|
| Will the data collected for your study be made available to others? | Yes                                                          |
| Would you like to offer context for your decision?                  | —                                                            |
| Which data?                                                         | Complete de-identified patient data set                      |
| Additional information about data                                   | —                                                            |
| How or where can the data be obtained?                              | mcorbacho@flsida.org                                         |
| When will data availability begin?                                  | 24/11/2020                                                   |
| When will data availability end?                                    | —                                                            |
| Will any supporting documents be available?                         | —                                                            |
| Which supporting documents?                                         | —                                                            |
| Additional information about supporting documents                   | —                                                            |
| How or where can supporting documents be obtained?                  | —                                                            |
| When will supporting documents availability begin?                  | —                                                            |
| When will supporting documents availability end?                    | —                                                            |
| To whom will data be available?                                     | Researchers whose proposed use of the data has been approved |
| For what type of analysis or purpose?                               | For any purpose                                              |
| By what mechanism?                                                  | —                                                            |
| Any other restrictions?                                             | —                                                            |
| Additional information                                              | —                                                            |

This statement was posted on November 24, 2020, at NEJM.org.
